# Supplementary material for: miR-18a-5p Facilitates Malignant Progression of Head and Neck Squamous Cell Carcinoma Cells via Modulating SORBS2
Source: Hindawi journal article supplement (doi:10.1155/2021/5953881), 2021-10-18
Supplement: f1 [file 5953881.f1.pdf]

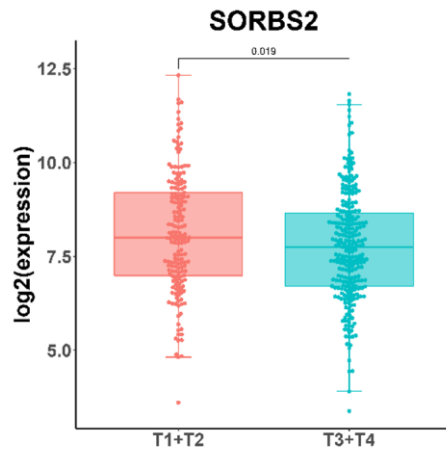

**Supplementary figure 1 Expression differences of SORBS2 in HNSCC patients with different T stages**

SORBS2 was differentially expressed in patients with various T stage tumors, while it was markedly decreased in patients with T3+T4 tumors compared to those with T1+T2 tumors
